# Supplementary material
Source: PubMed Central journal article supplement (PMC9930592)
Supplement: NIHMS1866203-supplement-2.pdf [file NIHMS1866203-supplement-2.pdf]

## ■ ASSOCIATED CONTENT

### 📄 Supporting Information

The Supporting Information is available free of charge on the ACS Publications website at DOI: [10.1021/acsinfect.8b00100](https://doi.org/10.1021/acsinfect.8b00100).

Additional homology assessment for GlpO; OPA, antibody, and particle characterization results for various LEPS(20V) formulations; mouse body and organ weight response upon vaccine administration ([PDF](#))
