# Supplementary material
Source: PubMed Central journal article supplement (PMC9930592)
Supplement: NIHMS1866203-supplement-SM.pdf [file NIHMS1866203-supplement-SM.pdf]

**Title:** Engineering a next-generation glycoconjugate-like *Streptococcus pneumoniae* vaccine

**Authors:** Andrew B. Hill<sup>1,2</sup>, Marie Beitelshes<sup>1,2</sup>, Roozbeh Nayerhoda<sup>3</sup>, Blaine A. Pfeifer<sup>2,3\*</sup>, Charles H. Jones<sup>1\*</sup>

**Affiliations:**

<sup>1</sup>Abcombi Biosciences Inc., 1576 Sweet Home Road, Amherst, New York, 14228, USA.

<sup>2</sup>Department of Chemical and Biological Engineering, University at Buffalo, The State University of New York, Buffalo, New York, 14260, USA.

<sup>3</sup>Department of Biomedical Engineering, University at Buffalo, The State University of New York, Buffalo, New York, 14260, USA.

\*Correspondence to: [charles.jones@abcombibio.com](mailto:charles.jones@abcombibio.com), [blainepf@buffalo.edu](mailto:blainepf@buffalo.edu).

**Pages S1-S14**

**Tables 1-8**

**Figures 1-3**

**Supplementary Table 1: Microfloral bacteria with GIpO homologs tested for cross-reactivity with percent homology of protein regions indicated**

| Species                             | Colonization Location                    | Full-Length | Average Homology   |         |
|-------------------------------------|------------------------------------------|-------------|--------------------|---------|
|                                     |                                          |             | Surface-Accessible | Epitope |
| <i>Streptococcus mitis</i> *        | Oral Cavity, Throat, Nasopharynx         | 98%         | 92%                | 99%     |
| <i>Streptococcus oralis</i>         | Oral Cavity                              | 97%         | 97%                | 99%     |
| <i>Streptococcus infantis</i> *     | Upper Respiratory                        | 97%         | 97%                | 97%     |
| <i>Streptococcus cristatus</i>      | Oral Cavity                              | 95%         | 95%                | 95%     |
| <i>Streptococcus parasanguinis</i>  | Oral Cavity                              | 93%         | 92%                | 95%     |
| <i>Streptococcus sanguinis</i>      | Oral Cavity                              | 94%         | 94%                | 95%     |
| <i>Streptococcus gordonii</i>       | Oral Cavity                              | 95%         | 94%                | 94%     |
| <i>Streptococcus salivarius</i>     | Oral Cavity, Upper Respiratory           | 94%         | 94%                | 93%     |
| <i>Streptococcus dysgalactiae</i> * | Gastrointestinal and Genitourinary Tract | 75%         | 75%                | 73%     |
| <i>Streptococcus pyogenes</i>       | Upper Respiratory, Skin                  | 75%         | 74%                | 72%     |
| <i>Lactobacillus iners</i>          | Vaginal Tract                            | 63%         | 64%                | 70%     |
| <i>Streptococcus agalactiae</i> **  | Gastrointestinal and Genitourinary Tract | 71%         | 72%                | 68%     |
| <i>Alloiococcus otitis</i> *        | Nasopharynx                              | 64%         | 64%                | 64%     |
| <i>Enterococcus durans</i>          | Gastrointestinal Tract                   | 61%         | 61%                | 64%     |
| <i>Lactobacillus plantarum</i> **   | Gastrointestinal Tract                   | 62%         | 63%                | 62%     |
| <i>Enterococcus faecalis</i> *      | Gastrointestinal Tract                   | 63%         | 63%                | 62%     |
| <i>Lactobacillus salivarius</i> **  | Gastrointestinal Tract                   | 60%         | 59%                | 61%     |
| <i>Aerococcus christensenii</i> *   | Vaginal Tract                            | 60%         | 62%                | 61%     |
| <i>Pediococcus acidilactici</i> **  | Gastrointestinal Tract                   | 58%         | 58%                | 58%     |
| <i>Lactobacillus pentosus</i>       | Vaginal Tract, Gastrointestinal Tract    | 63%         | 62%                | 58%     |

\*Evaluated for antibody binding via immunofluorescence assay

\*\*Evaluated for antibody binding and neutralization activity using OPA assay

**Supplementary Table 2: Complete OPA data for LEPS(20V):PncO dose escalation**

| Serotype | PCV13      |     | PPSV23     |     | LEPS(20V):PncO<br>(34 µg) |     | LEPS(20V):PncO<br>(68 µg) |     | LEPS(20V):PncO<br>(136 µg) |     |
|----------|------------|-----|------------|-----|---------------------------|-----|---------------------------|-----|----------------------------|-----|
|          | Planktonic | BFR | Planktonic | BFR | Planktonic                | BFR | Planktonic                | BFR | Planktonic                 | BFR |
| 1        | 150        | --- | 126        | --- | 120                       | 45  | 205                       | 150 | 189                        | 128 |
| 2        | ---        | --- | 101        | --- | 110                       | 145 | 136                       | 150 | 172                        | 208 |
| 3        | 120        | --- | 30         | --- | 112                       | 182 | 136                       | 196 | 132                        | 230 |
| 4        | 48         | --- | 51         | --- | 182                       | 486 | 233                       | 192 | 224                        | 571 |
| 5        | 56         | --- | 92         | --- | 53                        | 366 | 73                        | 608 | 62                         | 545 |
| 6A       | 59         | --- | ---        | --- | 211                       | 88  | 285                       | 491 | 257                        | 111 |
| 6B       | 50         | --- | 30         | --- | 178                       | 18  | 235                       | 96  | 207                        | 30  |
| 6C       | ---        | --- | ---        | --- | ---                       | 317 | ---                       | 23  | ---                        | 358 |
| 6D       | ---        | --- | ---        | --- | ---                       | 440 | ---                       | 289 | ---                        | 489 |
| 7A       | ---        | --- | ---        | --- | ---                       | 162 | ---                       | 489 | ---                        | 231 |
| 7B       | ---        | --- | ---        | --- | ---                       | 94  | ---                       | 174 | ---                        | 120 |
| 7C       | ---        | --- | ---        | --- | ---                       | 152 | ---                       | 115 | ---                        | 188 |
| 7F       | 180        | --- | 33         | --- | 171                       | 44  | 234                       | 172 | 227                        | 72  |
| 8        | ---        | --- | 81         | --- | 135                       | 70  | 168                       | 56  | 198                        | 81  |
| 9A       | ---        | --- | ---        | --- | ---                       | 100 | ---                       | 67  | ---                        | 117 |
| 9N       | ---        | --- | 59         | --- | 20                        | 397 | 24                        | 117 | 27                         | 529 |
| 9V       | 187        | --- | 125        | --- | 149                       | 435 | 165                       | 468 | 193                        | 435 |
| 10A      | ---        | --- | 150        | --- | ---                       | 47  | ---                       | 392 | ---                        | 83  |
| 10F      | ---        | --- | ---        | --- | ---                       | 30  | ---                       | 62  | ---                        | 44  |
| 11A      | ---        | --- | 96         | --- | ---                       | 59  | ---                       | 40  | ---                        | 76  |
| 11B      | ---        | --- | ---        | --- | ---                       | 66  | ---                       | 63  | ---                        | 110 |
| 11C      | ---        | --- | ---        | --- | ---                       | 82  | ---                       | 86  | ---                        | 96  |
| 12A      | ---        | --- | ---        | --- | ---                       | 102 | ---                       | 86  | ---                        | 108 |
| 12B      | ---        | --- | ---        | --- | ---                       | 354 | ---                       | 95  | ---                        | 450 |
| 12F      | ---        | --- | 38         | --- | 161                       | 366 | 190                       | 429 | 221                        | 515 |
| 13       | ---        | --- | ---        | --- | ---                       | 126 | ---                       | 472 | ---                        | 158 |
| 14       | 105        | --- | 37         | --- | 51                        | 221 | 63                        | 122 | 58                         | 230 |
| 15A      | ---        | --- | ---        | --- | ---                       | 61  | ---                       | 234 | ---                        | 88  |
| 15B      | ---        | --- | 172        | --- | ---                       | 386 | ---                       | 80  | ---                        | 382 |
| 15C      | ---        | --- | ---        | --- | ---                       | 306 | ---                       | 375 | ---                        | 485 |
| 15F      | ---        | --- | ---        | --- | ---                       | 196 | ---                       | 401 | ---                        | 305 |
| 16A      | ---        | --- | ---        | --- | ---                       | 182 | ---                       | 229 | ---                        | 295 |
| 16F      | ---        | --- | ---        | --- | ---                       | 230 | ---                       | 246 | ---                        | 311 |

|     |     |     |     |     |     |     |     |     |     |     |
|-----|-----|-----|-----|-----|-----|-----|-----|-----|-----|-----|
| 17A | --- | --- | --- | --- | --- | 283 | --- | 251 | --- | 312 |
| 17F | --- | --- | 110 | --- | 126 | 229 | 139 | 260 | 125 | 345 |
| 18A | --- | --- | --- | --- | --- | 133 | --- | 264 | --- | 163 |
| 18B | --- | --- | --- | --- | --- | 303 | --- | 163 | --- | 379 |
| 18C | 180 | --- | 48  | --- | 212 | 393 | 282 | 333 | 245 | 612 |
| 18F | --- | --- | --- | --- | --- | 173 | --- | 523 | --- | 198 |
| 19A | 180 | --- | 134 | --- | 180 | 76  | 243 | 185 | 224 | 96  |
| 19C | --- | --- | --- | --- | --- | 172 | --- | 75  | --- | 267 |
| 19F | 200 | --- | 55  | --- | 326 | 322 | 365 | 217 | 325 | 519 |
| 20  | --- | --- | 43  | --- | 102 | 201 | 122 | 425 | 122 | 245 |
| 21  | --- | --- | --- | --- | --- | 322 | --- | 211 | --- | 490 |
| 22A | --- | --- | --- | --- | --- | 406 | --- | 412 | --- | 655 |
| 22F | --- | --- | 79  | --- | 201 | 432 | 272 | 504 | 253 | 545 |
| 23A | --- | --- | --- | --- | --- | 72  | --- | 510 | --- | 70  |
| 23B | --- | --- | --- | --- | --- | 353 | --- | 66  | --- | 615 |
| 23F | 170 | --- | 15  | --- | 81  | 333 | 97  | 455 | 106 | 365 |
| 24A | --- | --- | --- | --- | --- | 23  | --- | 376 | --- | 22  |
| 24B | --- | --- | --- | --- | --- | 284 | --- | 21  | --- | 256 |
| 24F | --- | --- | --- | --- | --- | 80  | --- | 272 | --- | 96  |
| 25F | --- | --- | --- | --- | --- | 269 | --- | 100 | --- | 328 |
| 27  | --- | --- | --- | --- | --- | 108 | --- | 288 | --- | 151 |
| 28A | --- | --- | --- | --- | --- | 214 | --- | 141 | --- | 193 |
| 28F | --- | --- | --- | --- | --- | 358 | --- | 197 | --- | 470 |
| 29  | --- | --- | --- | --- | --- | 82  | --- | 351 | --- | 121 |
| 30  | --- | --- | --- | --- | --- | 274 | --- | 96  | --- | 325 |
| 31  | --- | --- | --- | --- | --- | 199 | --- | 346 | --- | 240 |
| 33A | --- | --- | --- | --- | --- | 401 | --- | 261 | --- | 430 |
| 33F | --- | --- | 20  | --- | --- | 199 | --- | 361 | --- | 241 |
| 34  | --- | --- | --- | --- | --- | 320 | --- | 217 | --- | 414 |
| 35A | --- | --- | --- | --- | --- | 109 | --- | 324 | --- | 118 |
| 35B | --- | --- | --- | --- | --- | 61  | --- | 109 | --- | 100 |
| 35C | --- | --- | --- | --- | --- | 212 | --- | 80  | --- | 304 |
| 35F | --- | --- | --- | --- | --- | 32  | --- | 240 | --- | 42  |
| 37  | --- | --- | --- | --- | --- | 161 | --- | 42  | --- | 211 |
| 38  | --- | --- | --- | --- | --- | 92  | --- | 187 | --- | 118 |
| 39  | --- | --- | --- | --- | --- | 231 | --- | 109 | --- | 266 |
| 41A | --- | --- | --- | --- | --- | 320 | --- | 274 | --- | 415 |
| 42F | --- | --- | --- | --- | --- | 188 | --- | 349 | --- | 279 |

**Supplementary Table 3: Complete OPA data for LEPS(20V):GlpO+PncO dose escalation**

| Serotype | PCV13      |     | PPSV23     |     | LEPS(20V):GlpO+PncO<br>(68 µg) |     | LEPS(20V):GlpO+PncO<br>(136 µg) |     | LEPS(20V):GlpO+PncO<br>(272 µg) |     |
|----------|------------|-----|------------|-----|--------------------------------|-----|---------------------------------|-----|---------------------------------|-----|
|          | Planktonic | BFR | Planktonic | BFR | Planktonic                     | BFR | Planktonic                      | BFR | Planktonic                      | BFR |
| 1        | 150        | --- | 126        | --- | 176                            | 45  | 219                             | 150 | 146                             | 128 |
| 2        | ---        | --- | 101        | --- | 110                            | 145 | 212                             | 150 | 143                             | 208 |
| 3        | 120        | --- | 30         | --- | 144                            | 182 | 143                             | 196 | 184                             | 230 |
| 4        | 48         | --- | 51         | --- | 222                            | 486 | 233                             | 192 | 191                             | 571 |
| 5        | 56         | --- | 92         | --- | 63                             | 366 | 52                              | 608 | 63                              | 545 |
| 6A       | 59         | --- | ---        | --- | 302                            | 88  | 287                             | 491 | 269                             | 111 |
| 6B       | 50         | --- | 30         | --- | 289                            | 18  | 263                             | 96  | 347                             | 30  |
| 6C       | ---        | --- | ---        | --- | ---                            | 317 | ---                             | 23  | ---                             | 358 |
| 6D       | ---        | --- | ---        | --- | ---                            | 440 | ---                             | 289 | ---                             | 489 |
| 7A       | ---        | --- | ---        | --- | ---                            | 162 | ---                             | 489 | ---                             | 231 |
| 7B       | ---        | --- | ---        | --- | ---                            | 94  | ---                             | 174 | ---                             | 120 |
| 7C       | ---        | --- | ---        | --- | ---                            | 152 | ---                             | 115 | ---                             | 188 |
| 7F       | 180        | --- | 33         | --- | 245                            | 44  | 247                             | 172 | 196                             | 72  |
| 8        | ---        | --- | 81         | --- | 154                            | 70  | 178                             | 56  | 171                             | 81  |
| 9A       | ---        | --- | ---        | --- | ---                            | 100 | ---                             | 67  | ---                             | 117 |
| 9N       | ---        | --- | 59         | --- | 28                             | 397 | 23                              | 117 | 26                              | 529 |
| 9V       | 187        | --- | 125        | --- | 208                            | 435 | 189                             | 468 | 181                             | 435 |
| 10A      | ---        | --- | 150        | --- | ---                            | 47  | ---                             | 392 | ---                             | 83  |
| 10F      | ---        | --- | ---        | --- | ---                            | 30  | ---                             | 62  | ---                             | 44  |
| 11A      | ---        | --- | 96         | --- | ---                            | 59  | ---                             | 40  | ---                             | 76  |
| 11B      | ---        | --- | ---        | --- | ---                            | 66  | ---                             | 63  | ---                             | 110 |
| 11C      | ---        | --- | ---        | --- | ---                            | 82  | ---                             | 86  | ---                             | 96  |
| 12A      | ---        | --- | ---        | --- | ---                            | 102 | ---                             | 86  | ---                             | 108 |
| 12B      | ---        | --- | ---        | --- | ---                            | 354 | ---                             | 95  | ---                             | 450 |
| 12F      | ---        | --- | 38         | --- | 225                            | 366 | 241                             | 429 | 247                             | 515 |
| 13       | ---        | --- | ---        | --- | ---                            | 126 | ---                             | 472 | ---                             | 158 |
| 14       | 105        | --- | 37         | --- | 57                             | 221 | 100                             | 122 | 157                             | 230 |
| 15A      | ---        | --- | ---        | --- | ---                            | 61  | ---                             | 234 | ---                             | 88  |
| 15B      | ---        | --- | 172        | --- | ---                            | 386 | ---                             | 80  | ---                             | 382 |
| 15C      | ---        | --- | ---        | --- | ---                            | 306 | ---                             | 375 | ---                             | 485 |
| 15F      | ---        | --- | ---        | --- | ---                            | 196 | ---                             | 401 | ---                             | 305 |
| 16A      | ---        | --- | ---        | --- | ---                            | 182 | ---                             | 229 | ---                             | 295 |
| 16F      | ---        | --- | ---        | --- | ---                            | 230 | ---                             | 246 | ---                             | 311 |

|     |     |     |     |     |     |     |     |     |     |     |
|-----|-----|-----|-----|-----|-----|-----|-----|-----|-----|-----|
| 17A | --- | --- | --- | --- | --- | 283 | --- | 251 | --- | 312 |
| 17F | --- | --- | 110 | --- | 168 | 229 | 111 | 260 | 208 | 345 |
| 18A | --- | --- | --- | --- | --- | 133 | --- | 264 | --- | 163 |
| 18B | --- | --- | --- | --- | --- | 303 | --- | 163 | --- | 379 |
| 18C | 180 | --- | 48  | --- | 260 | 393 | 216 | 333 | 278 | 612 |
| 18F | --- | --- | --- | --- | --- | 173 | --- | 523 | --- | 198 |
| 19A | 180 | --- | 134 | --- | 216 | 76  | 190 | 185 | 182 | 96  |
| 19C | --- | --- | --- | --- | --- | 172 | --- | 75  | --- | 267 |
| 19F | 200 | --- | 55  | --- | 372 | 322 | 273 | 217 | 420 | 519 |
| 20  | --- | --- | 43  | --- | 129 | 201 | 103 | 425 | 123 | 245 |
| 21  | --- | --- | --- | --- | --- | 322 | --- | 211 | --- | 490 |
| 22A | --- | --- | --- | --- | --- | 406 | --- | 412 | --- | 655 |
| 22F | --- | --- | 79  | --- | 285 | 432 | 258 | 504 | 285 | 545 |
| 23A | --- | --- | --- | --- | --- | 72  | --- | 510 | --- | 70  |
| 23B | --- | --- | --- | --- | --- | 353 | --- | 66  | --- | 615 |
| 23F | 170 | --- | 15  | --- | 115 | 333 | 125 | 455 | 138 | 365 |
| 24A | --- | --- | --- | --- | --- | 23  | --- | 376 | --- | 22  |
| 24B | --- | --- | --- | --- | --- | 284 | --- | 21  | --- | 256 |
| 24F | --- | --- | --- | --- | --- | 80  | --- | 272 | --- | 96  |
| 25F | --- | --- | --- | --- | --- | 269 | --- | 100 | --- | 328 |
| 27  | --- | --- | --- | --- | --- | 108 | --- | 288 | --- | 151 |
| 28A | --- | --- | --- | --- | --- | 214 | --- | 141 | --- | 193 |
| 28F | --- | --- | --- | --- | --- | 358 | --- | 197 | --- | 470 |
| 29  | --- | --- | --- | --- | --- | 82  | --- | 351 | --- | 121 |
| 30  | --- | --- | --- | --- | --- | 274 | --- | 96  | --- | 325 |
| 31  | --- | --- | --- | --- | --- | 199 | --- | 346 | --- | 240 |
| 33A | --- | --- | --- | --- | --- | 401 | --- | 261 | --- | 430 |
| 33F | --- | --- | 20  | --- | --- | 199 | --- | 361 | --- | 241 |
| 34  | --- | --- | --- | --- | --- | 320 | --- | 217 | --- | 414 |
| 35A | --- | --- | --- | --- | --- | 109 | --- | 324 | --- | 118 |
| 35B | --- | --- | --- | --- | --- | 61  | --- | 109 | --- | 100 |
| 35C | --- | --- | --- | --- | --- | 212 | --- | 80  | --- | 304 |
| 35F | --- | --- | --- | --- | --- | 32  | --- | 240 | --- | 42  |
| 37  | --- | --- | --- | --- | --- | 161 | --- | 42  | --- | 211 |
| 38  | --- | --- | --- | --- | --- | 92  | --- | 187 | --- | 118 |
| 39  | --- | --- | --- | --- | --- | 231 | --- | 109 | --- | 266 |
| 41A | --- | --- | --- | --- | --- | 320 | --- | 274 | --- | 415 |
| 42F | --- | --- | --- | --- | --- | 188 | --- | 349 | --- | 279 |

**Supplementary Table 4: LEPS(24V):PncO planktonic serotype OPA data**

| Serotype | PCV13 | PPSV23 | LEPS(24V):CRM197 | LEPS(24V):PncO |
|----------|-------|--------|------------------|----------------|
| 1        | 150   | 126    | 156              | 178            |
| 2        | ---   | 101    | 129              | 134            |
| 3        | 120   | 30     | 110              | 113            |
| 4        | 48    | 51     | 211              | 209            |
| 5        | 56    | 92     | 105              | 210            |
| 6A       | 59    | ---    | 254              | 312            |
| 6B       | 50    | 30     | 217              | 217            |
| 7F       | 180   | 33     | 169              | 186            |
| 8        | ---   | 81     | 147              | 181            |
| 9N       | ---   | 59     | 88               | 108            |
| 9V       | 187   | 125    | 165              | 148            |
| 10A      | ---   | 150    | 178              | 196            |
| 11A      | ---   | 96     | 205              | 205            |
| 12F      | ---   | 38     | 179              | 186            |
| 14       | 105   | 37     | 165              | 172            |
| 15B      | ---   | 172    | 146              | 146            |
| 17F      | ---   | 110    | 155              | 154            |
| 18C      | 180   | 48     | 257              | 272            |
| 19A      | 180   | 134    | 211              | 232            |
| 19F      | 200   | 55     | 210              | 189            |
| 20       | ---   | 43     | 114              | 139            |
| 22F      | ---   | 79     | 255              | 232            |
| 23F      | 170   | 15     | 182              | 189            |
| 33F      | ---   | 20     | 205              | 262            |

**Supplementary Table 5: Size and charge characterization of LEPS variants**

| Attachment Strategy | Size (nm)    | Zeta Potential (mV) |
|---------------------|--------------|---------------------|
| <b>[Ni-NTA]</b>     |              |                     |
| Empty               | 110.0 ± 17.6 | -11.0 ± 1.4         |
| 20-Valent           | 193.5 ± 13.8 | -10.2 ± 2.8         |
| 20-Valent + Protein | 179.2 ± 20.6 | -17.9 ± 2.2         |
| 24-Valent           | 249.1 ± 9.0  | -12.3 ± 1.6         |
| 24-Valent + Protein | 286.7 ± 20.2 | -15.9 ± 2.7         |
| <b>[Co-NTA]</b>     |              |                     |
| Empty               | 113.3 ± 22.5 | -9.8 ± 1.7          |
| 20-Valent           | 181.9 ± 14.2 | -11.8 ± 3.2         |
| 20-Valent + Protein | 225.8 ± 16.5 | -17.5 ± 2.4         |
| 24-Valent           | 221.3 ± 10.8 | -11.8 ± 1.6         |
| 24-Valent + Protein | 237.9 ± 17.8 | -13.5 ± 3.4         |
| <b>BSB</b>          |              |                     |
| Empty               | 128.5 ± 14.2 | -13.7 ± 2.3         |
| 20-Valent           | 249.2 ± 18.9 | -16.4 ± 2.0         |
| 20-Valent + Protein | 207.1 ± 19.7 | -23.1 ± 2.7         |
| 24-Valent           | 255.3 ± 13.6 | -16.4 ± 1.9         |
| 24-Valent + Protein | 275.4 ± 21.9 | -22.2 ± 1.8         |
| <b>BS</b>           |              |                     |
| Empty               | 138.0 ± 16.3 | -15.5 ± 2.6         |
| 20-Valent           | 225.3 ± 11.6 | -14.1 ± 2.0         |
| 20-Valent + Protein | 232.5 ± 19.2 | -20.5 ± 1.4         |
| 24-Valent           | 256.3 ± 16.0 | -16.6 ± 2.4         |
| 24-Valent + Protein | 265.1 ± 15.5 | -22.0 ± 1.2         |



**Supplementary Table 6: Body and organ weight of mice post vaccination**

| Animal                        | Sham       | Alum:PncO  |            |            | LEPS(20V):CRM197 |            |            |
|-------------------------------|------------|------------|------------|------------|------------------|------------|------------|
|                               |            | 1×         | 5×         | 10×        | 1×               | 5×         | 10×        |
| Terminal Weight               | -          |            |            |            |                  |            |            |
| <b>Male CD-1 Mice (N=5)</b>   |            |            |            |            |                  |            |            |
| Body Weight (g)               | 30.3 ± 3.1 | 30.6 ± 2.1 | 29.7 ± 2.3 | 31.8 ± 2.4 | 31.5 ± 2.9       | 30.3 ± 1.8 | 31.5 ± 2.5 |
| Brain Weight (mg)             | 472.0 ± 26 | 462.6 ± 20 | 472.0 ± 25 | 463.4 ± 26 | 467.8 ± 16       | 472.6 ± 19 | 468.6 ± 20 |
| Lung Weight (mg)              | 180.0 ± 15 | 185.4 ± 23 | 174.6 ± 25 | 174.6 ± 6  | 171.0 ± 17       | 185.4 ± 18 | 171.0 ± 15 |
| Heart Weight (mg)             | 175.0 ± 23 | 169.8 ± 15 | 180.3 ± 28 | 166.3 ± 17 | 171.5 ± 15       | 173.3 ± 26 | 182.0 ± 21 |
| Liver Weight (g)              | 1.8 ± 0.23 | 1.8 ± 0.22 | 1.8 ± 0.18 | 1.8 ± 0.25 | 1.7 ± 0.17       | 1.9 ± 0.15 | 1.7 ± 0.3  |
| Kidney Weight (mg)            | 440.0 ± 62 | 422.4 ± 30 | 421.3 ± 41 | 453.3 ± 20 | 465.1 ± 32       | 453.2 ± 31 | 449.7 ± 22 |
| <b>Female CD-1 Mice (N=5)</b> |            |            |            |            |                  |            |            |
| Body Weight (g)               | 26.0 ± 1.5 | 27.0 ± 2.8 | 25.7 ± 2.8 | 26.3 ± 1.7 | 26.3 ± 2.3       | 26.7 ± 2.5 | 26.5 ± 2.1 |
| Brain Weight (mg)             | 460.0 ± 20 | 469.2 ± 28 | 433.4 ± 17 | 446.2 ± 30 | 461.1 ± 17       | 473.8 ± 16 | 455.4 ± 17 |
| Lung Weight (mg)              | 170.0 ± 21 | 176.8 ± 25 | 161.5 ± 20 | 173.4 ± 25 | 178.5 ± 23       | 161.5 ± 30 | 173.4 ± 16 |
| Heart Weight (mg)             | 150.0 ± 20 | 156.0 ± 25 | 154.5 ± 27 | 157.5 ± 29 | 144.0 ± 30       | 148.5 ± 29 | 145.5 ± 19 |
| Liver Weight (g)              | 1.3 ± 0.11 | 1.3 ± 0.29 | 1.3 ± 0.26 | 1.3 ± 0.15 | 1.2 ± 0.16       | 1.3 ± 0.23 | 1.3 ± 0.18 |
| Kidney Weight (mg)            | 280.0 ± 33 | 282.8 ± 55 | 282.8 ± 28 | 280.0 ± 51 | 294.0 ± 27       | 294.0 ± 37 | 282.2 ± 53 |

**Supplementary Table 7: Percent change in OPA 50% killing dilution of planktonic *S. pneumoniae* for LEPS(20V):PncO protein dose escalation**

| Serotype | LEPS(20V):PncO OPA Titer Percent Change |             |
|----------|-----------------------------------------|-------------|
|          | 34 → 68 µg                              | 68 → 136 µg |
| 1        | 71%                                     | -8%         |
| 2        | 24%                                     | 26%         |
| 3        | 21%                                     | -3%         |
| 4        | 28%                                     | -4%         |
| 5        | 39%                                     | -16%        |
| 6A       | 35%                                     | -10%        |
| 6B       | 32%                                     | -12%        |
| 7F       | 37%                                     | -3%         |
| 8        | 24%                                     | 18%         |
| 9N       | 17%                                     | 14%         |
| 9V       | 11%                                     | 17%         |
| 12F      | 18%                                     | 16%         |
| 14       | 23%                                     | -7%         |
| 17F      | 10%                                     | -10%        |
| 18C      | 33%                                     | -13%        |
| 19A      | 35%                                     | -8%         |
| 19F      | 12%                                     | -11%        |
| 20       | 20%                                     | 0%          |
| 22F      | 35%                                     | -7%         |
| 23F      | 20%                                     | 9%          |

**Supplementary Table 8: Percent change in antibody titer for LEPS(20V):PncO protein dose escalation**

| Serotype | LEPS(20V):PncO Antibody Titer Percent Change |             |
|----------|----------------------------------------------|-------------|
|          | 34 → 68 µg                                   | 68 → 136 µg |
| PncO     | 34%                                          | 49%         |
| 1        | 106%                                         | -12%        |
| 2        | 38%                                          | 35%         |
| 3        | 70%                                          | -69%        |
| 4        | -42%                                         | 5%          |
| 5        | 119%                                         | -57%        |
| 6A       | 97%                                          | -42%        |
| 6B       | 76%                                          | -43%        |
| 7F       | 66%                                          | -40%        |
| 8        | 19%                                          | 17%         |
| 9N       | -1%                                          | -7%         |
| 9V       | 24%                                          | -37%        |
| 12F      | 0%                                           | -20%        |
| 14       | 47%                                          | 0%          |
| 17F      | 33%                                          | -52%        |
| 18C      | 87%                                          | -21%        |
| 19A      | 85%                                          | -25%        |
| 19F      | -20%                                         | 9%          |
| 20       | 1%                                           | -21%        |
| 22F      | -6%                                          | -15%        |
| 23F      | 80%                                          | -14%        |

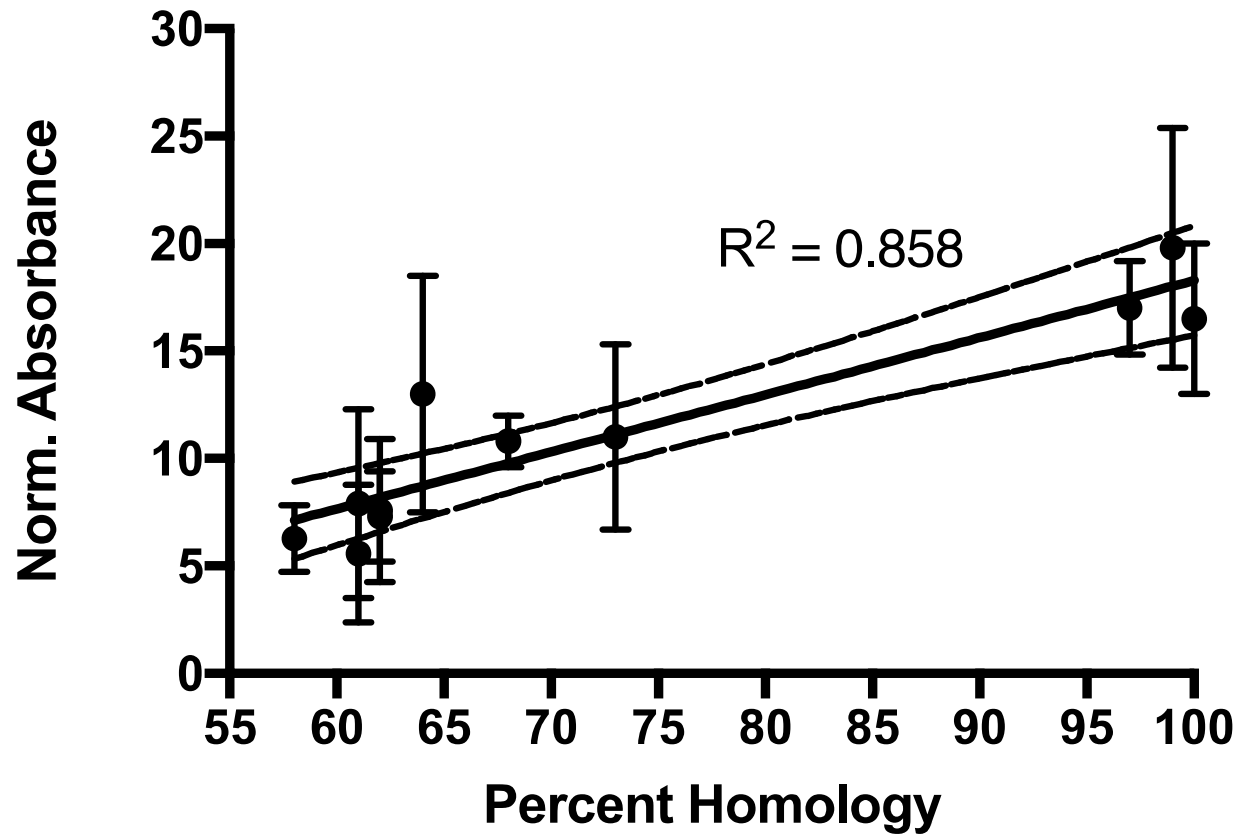

**Supplementary Figure 1:** Correlation between immunosorbent assay results and bacterial homology with GlpO. Dotted lines and error bars represent the 95% confidence interval of four technical replicates.

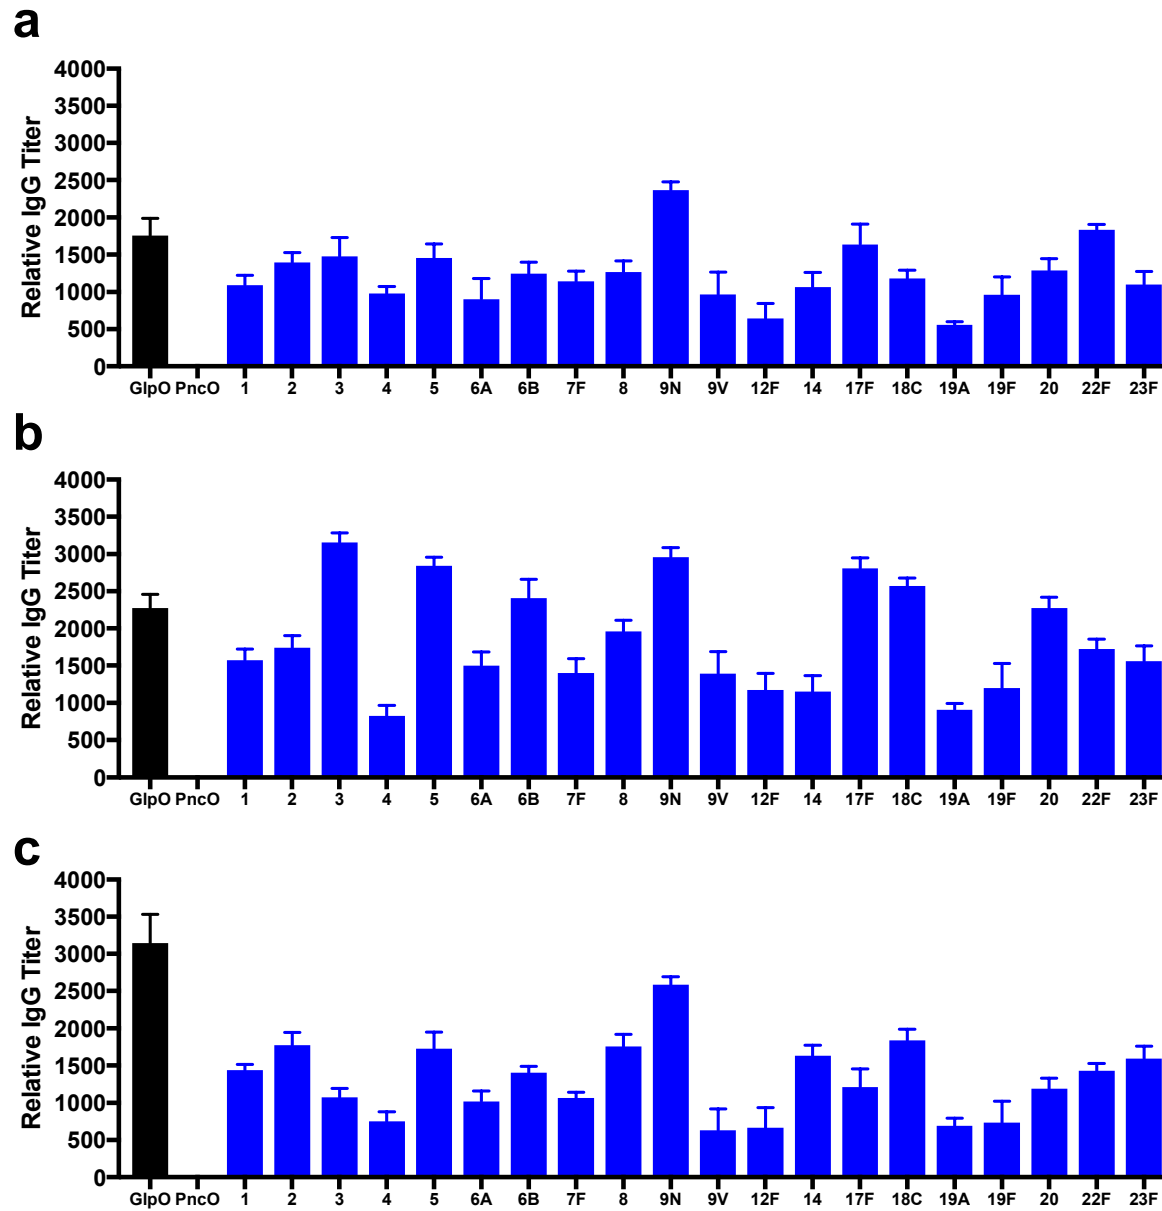

**Supplementary Figure 2:** GlpO dose escalation antibody titers. Concentration of protein (black) and CPS (blue) antibodies in mice vaccinated with 34 (a), 68 (b), or 136 (c) µg of protein in LEPS(20V):GlpO formulation. Error bars represent the 95% confidence interval of four biological replicates.

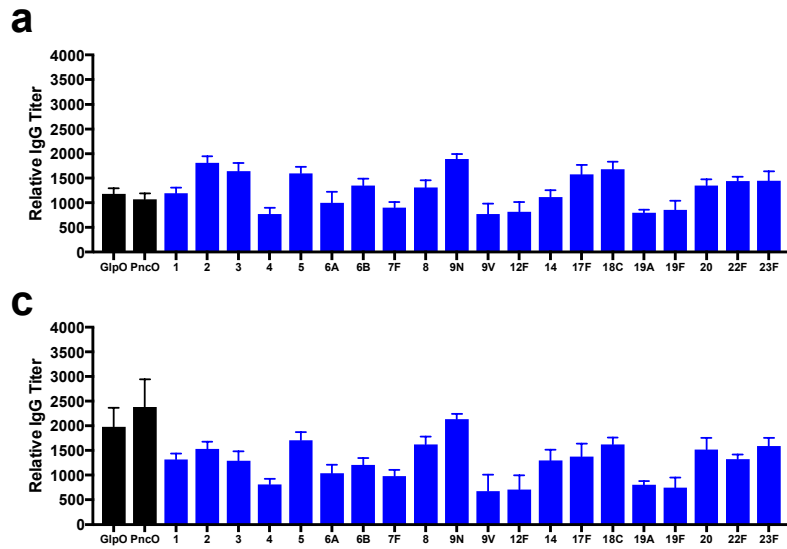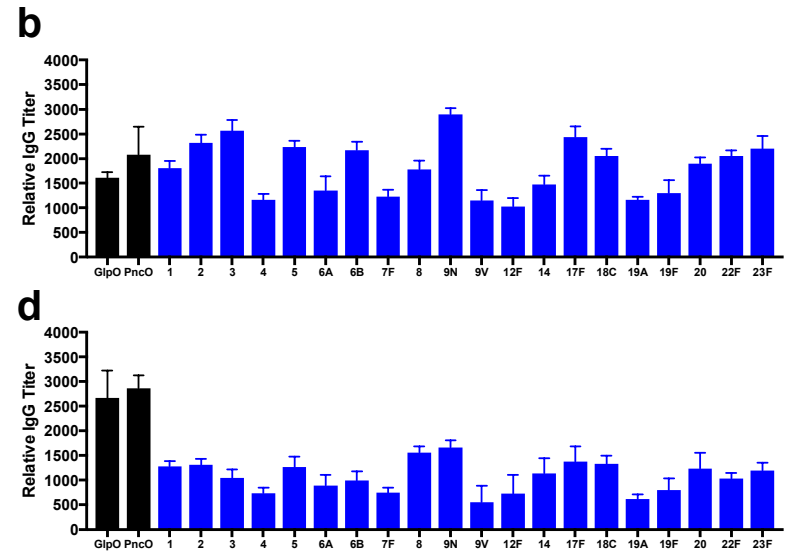

**Supplementary Figure 3:** GlpO+PncO dose escalation antibody titers. Concentration of protein (black) and CPS (blue) antibodies in mice vaccinated with 34 (a), 68 (b), 136 (c), or 272 (d) µg of total protein in LEPS(20V):GlpO+PncO formulation. Error bars represent the 95% confidence interval of four biological replicates.
